# Supplementary material for: Structure of the human Parkin ligase domain in an autoinhibited state
Source: PubMed Central journal article supplement (PMC3730226; doi:10.1038/emboj.2013.125), 2013-05-31
Supplement: emboj2013125s1.pdf [file emboj2013125s1.pdf]

# Structure of the human Parkin ligase domain in an autoinhibited state

## Supplementary Material

Tobias Wauer and David Komander<sup>1</sup>

Medical Research Council Laboratory of Molecular Biology, Cambridge, UK.

<sup>1</sup> Corresponding author: David Komander, [dk@mrc-lmb.cam.ac.uk](mailto:dk@mrc-lmb.cam.ac.uk)

Running title: Structure of the Parkin UPD-RBR

### **Contents:**

3 Supplementary Figures

1 Supplementary Table

Supplementary References

# Supplementary Figure 1

**A** Experimental electron density map, phased by Zn-SAD

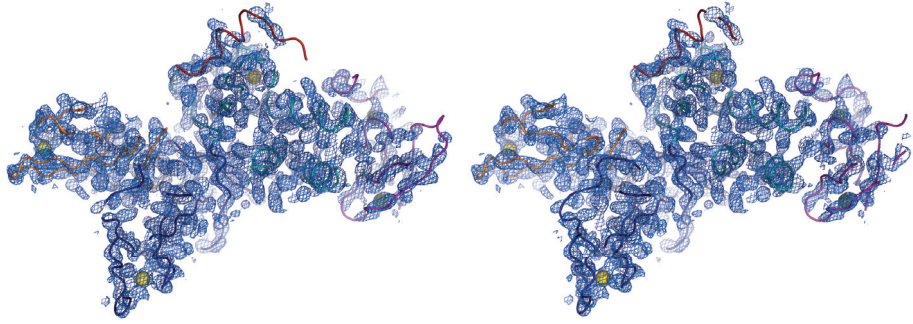

**B** Final refined electron density map

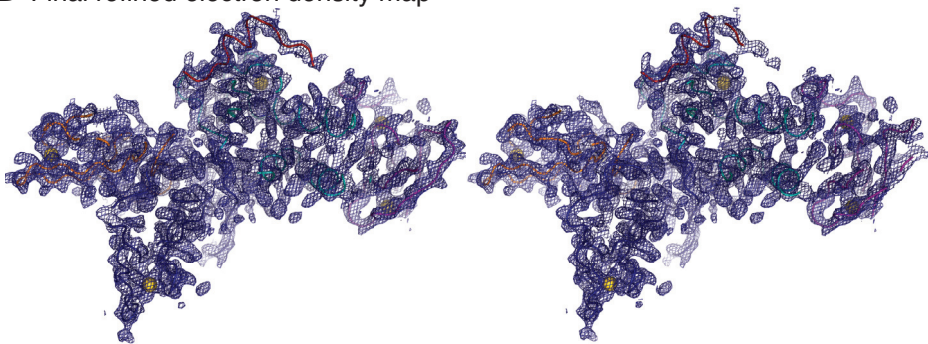

**C** RING2 positioning in crystal structures

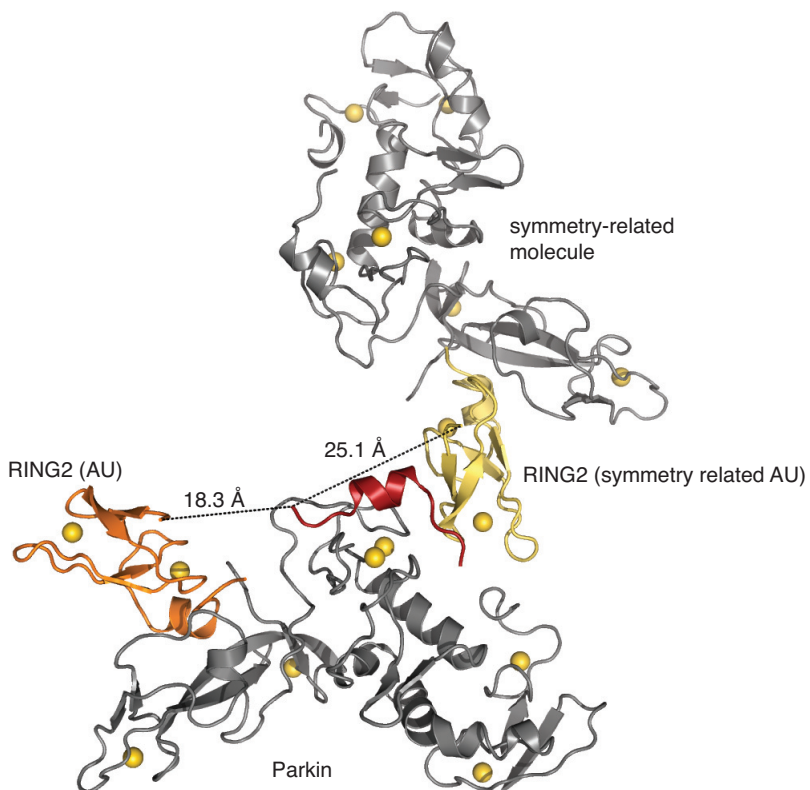

### Supplementary Figure 1. Electron density maps

Stereo picture of electron density covering Parkin in the asymmetric unit, shown as a ribbon diagram coloured as in **Figure 1B**. Zn atoms are shown as yellow spheres. **(A)** Experimental electron density map, contoured at  $1\sigma$ , after density modification by SHELXE. **(B)** Refined  $2|F_o|-|F_c|$  electron density map contoured at  $1\sigma$ . **(C)** Subdomain connectivity was initially ambiguous, as the disordered region between the linker helix and RING2 (aa 405-412) could reach RING2 of two neighbouring asymmetric units (AUs). The shorter distance (18.3 Å) connects the linker to the RING2 in the AU, as this domain forms strong hydrophobic contacts with the UPD, and RING2 would be autoinhibited. The longer distance (25.1 Å) would connect to a RING2 domain that would expose its catalytic Cys, and contact RING1, IBR and the linker helix, albeit only with few polar contacts. Our mutational and biochemical analysis makes the latter interface more unlikely. It was a possibility that the alternative RING2 conformation resembled that of an active 'open' state of Parkin (compare **Figure 5B**), but modelling of the E2~Ub (as in **Figure 5A**) led to significant clashes of the E2 with RING2 in the alternative position.

# Supplementary Figure 2

## A

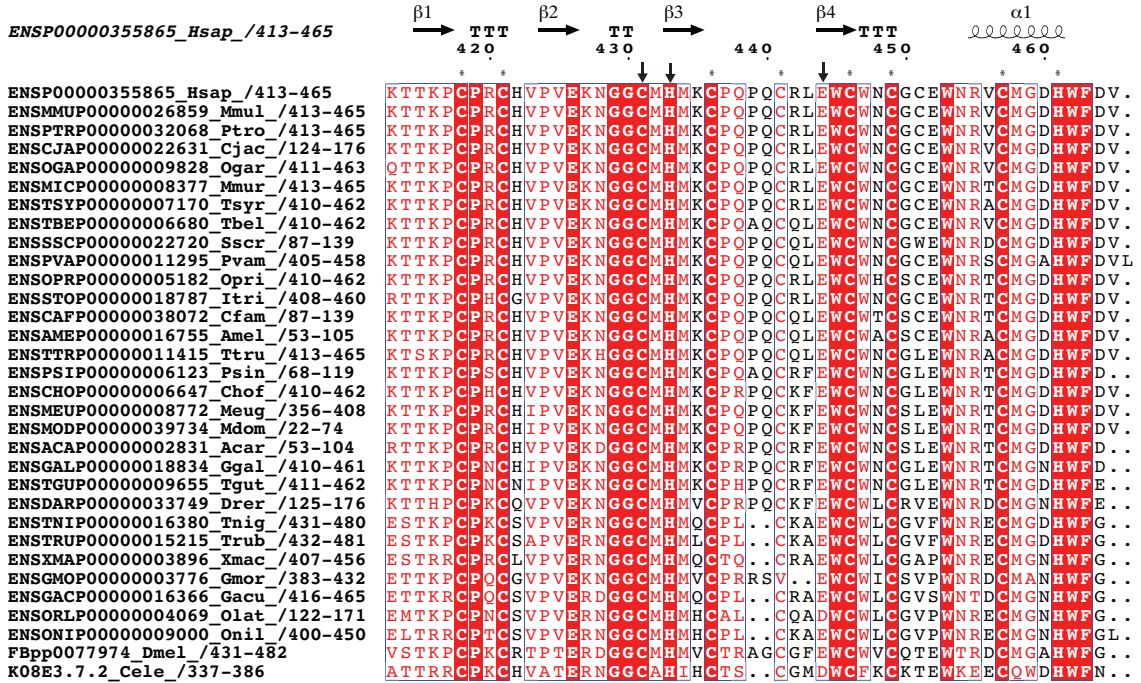

## B

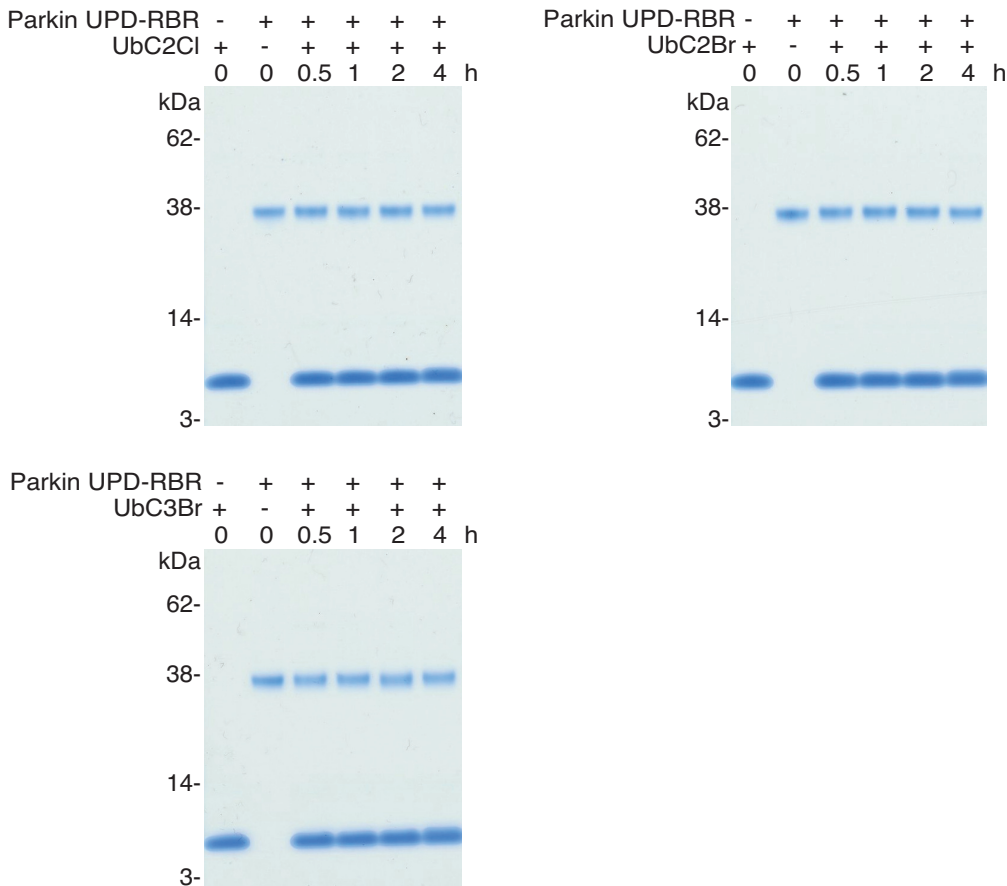

## Supplementary Figure 2. RING2 conservation in Parkin

Species alignment based on Parkin sequences annotated in ensemble ([http://www.ensembl.org/Homo\\_sapiens/Gene/Sequence?g=ENSG00000185345;r=6:161768452-163148803](http://www.ensembl.org/Homo_sapiens/Gene/Sequence?g=ENSG00000185345;r=6:161768452-163148803)) that contain a fully annotated RING2 sequence. Secondary structure and numbering based on the human sequence and according to the crystal structure is indicated above the alignment. **(B)** Ub-based suicide inhibitors are unable to modify the crystallised Parkin UPD-RBR fragment. Coomassie-stained SDS-PAGE gels are shown for incubation of Parkin with Ub-based suicide probes for indicated amount of time. The used Ub-haloalkyl probes are described in (Borodovsky *et al*, 2002).

# Supplementary Figure 3

**A**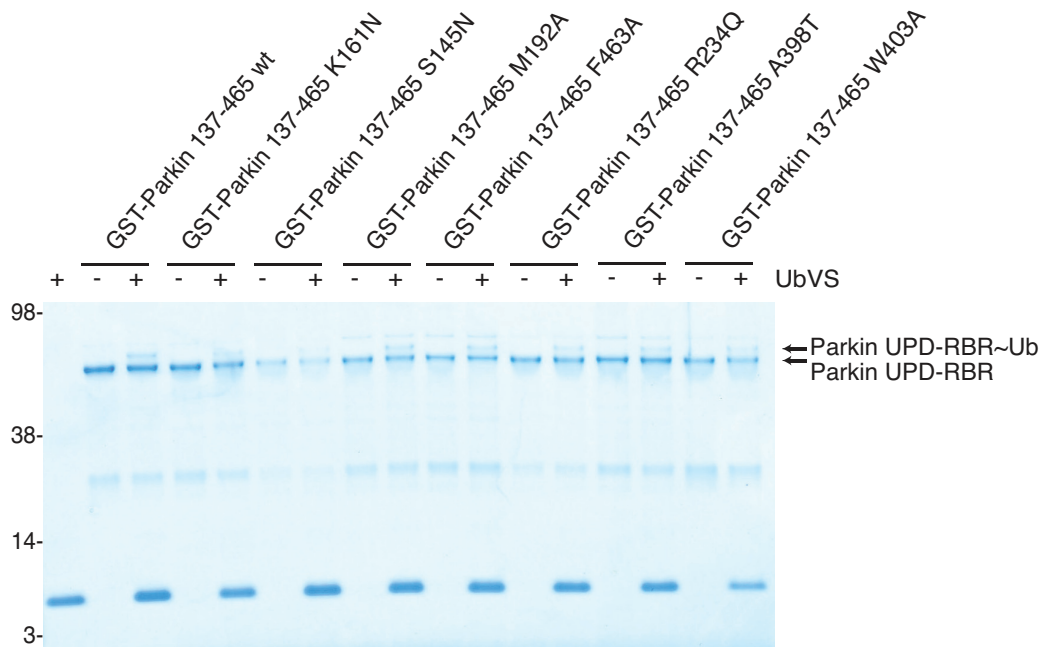**B**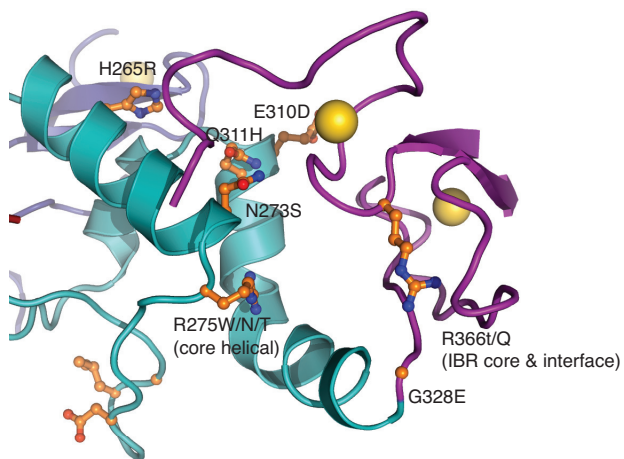

protruding RING1 extension  
D280N  
L283P  
G284R

**C**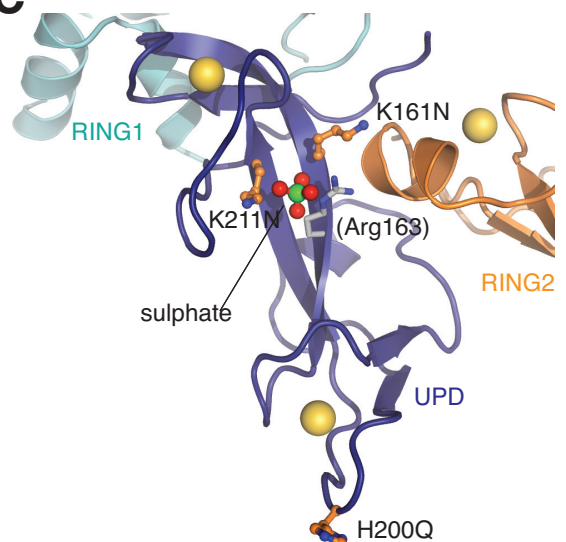

### **Supplementary Figure 3. Structural detail of Parkin mutations**

**(A)** modification of indicated GST-tagged Parkin UBP-RBR variants with Ub-vinylsulfone (UbVS). The GST-tag on wt UPD-RBR fragment activated the protein, which is modified with Ub-VS, and an increase in reactivity cannot be observed in this assay. **(B)** Parkin mutations in the RING1:IBR domain interface, including two core residues mutation of which may change the structure. Also, the three surface exposed mutations in the unique protruding  $\beta$ -hairpin of the RING1 domain are shown. This mutations hotspot indicates functional relevance, most likely in interactions with other proteins. **(C)** View of the UPD in a  $\sim 180^\circ$  rotated orientation as in **Figure 1B** (note RING2 on right hand side) showing three patient mutations. His200 is fully exposed. The sulphate ion is shown in ball-and-stick representation with a green sulphur atom and red oxygen atoms.

## Supplementary Table I. Known Parkin mutations in the crystallized construct

| Mutation                                     | Domain          | Predicted structural rationale                      | Biochemical effect                                                                                                                                                                                           |
|----------------------------------------------|-----------------|-----------------------------------------------------|--------------------------------------------------------------------------------------------------------------------------------------------------------------------------------------------------------------|
| <b><u>Zn-coordinating residues</u></b>       |                 |                                                     |                                                                                                                                                                                                              |
| <b>C166Y</b>                                 | UPD             | Coordinates UPD Zn2                                 |                                                                                                                                                                                                              |
| <b>C212G</b><br><b>C212Y</b>                 | UPD             | Coordinates UPD Zn1                                 | Reduced solubility (Wang <i>et al</i> , 2005)                                                                                                                                                                |
| <b>H215Q</b>                                 | UPD             | Coordinates UPD Zn1                                 |                                                                                                                                                                                                              |
| <b>C238Q</b>                                 | RING1           | Coordinates RING1 Zn1                               |                                                                                                                                                                                                              |
| <b>C253Y</b><br><b>C253W</b>                 | RING1           | Coordinates RING1 Zn2                               |                                                                                                                                                                                                              |
| <b>R256C</b>                                 | RING1           | Creates a competing Cys for RING1 Zn2 binding       | - Reduced complex formation (Van Humbeeck <i>et al</i> , 2008)<br>- Reduced solubility (Wang <i>et al</i> , 2005)<br>- Autoubiquitination, but reduced substrate ubiquitination (Sriram <i>et al</i> , 2005) |
| <b>H257R</b>                                 | RING1           | Coordinates RING1 Zn2                               |                                                                                                                                                                                                              |
| <b>C289G</b>                                 | RING1           | Coordinates RING1 Zn2                               | - Reduced solubility (Wang <i>et al</i> , 2005; Gu <i>et al</i> , 2003)                                                                                                                                      |
| <b>R334C</b>                                 | IBR             | Creates a competing Cys for IBR Zn1 binding         | - Reduced solubility (Wang <i>et al</i> , 2005)                                                                                                                                                              |
| <b>R402C</b><br><b>R402H</b>                 | Linker helix    | May interfere with Zn1 binding of RING1             |                                                                                                                                                                                                              |
| <b>C418R</b>                                 | RING2           | Coordinates RING2 Zn1                               | - Reduced solubility (Gu <i>et al</i> , 2003)                                                                                                                                                                |
| <b>C441R</b>                                 | RING2           | Coordinates RING2 Zn1                               | - Reduced solubility (Wang <i>et al</i> , 2005; Hampe, 2006)                                                                                                                                                 |
| <b><u>Domain core residues</u></b>           |                 |                                                     |                                                                                                                                                                                                              |
| <b>P153R</b>                                 | UPD             | In UPD Zn1 binding loop                             |                                                                                                                                                                                                              |
| <b>T173M</b>                                 | UPD             | In UPD Zn2 binding loop                             |                                                                                                                                                                                                              |
| <b>T240R</b><br><b>T240M</b>                 | RING1           | In RING1 Zn1 binding loop<br>May affect E2 binding  | - Ligase dead (Sriram <i>et al</i> , 2005)<br>- Reduced mitochondrial localization (Matsuda <i>et al</i> , 2010)                                                                                             |
| <b>V258M</b>                                 | RING1           | RING1 core residue, may affect linker helix binding |                                                                                                                                                                                                              |
| <b>Y267H</b>                                 | RING1 helical   | Core residue of RING1 helical domain                |                                                                                                                                                                                                              |
| <b>C268R</b>                                 | RING1 (helical) | Core residue of RING1 helical domain                |                                                                                                                                                                                                              |
| <b>R275N</b><br><b>R275W</b><br><b>R275T</b> | RING1 (helical) | RING1 helical domain core residue                   | - Reduced solubility (Wang <i>et al</i> , 2005)<br>- Increased ubiquitination activity (Sriram <i>et al</i> , 2005)<br>- No mitophagy (Narendra <i>et al</i> , 2010; Geisler <i>et al</i> , 2010)            |
| <b>I298S</b><br><b>I298L</b>                 | RING1           | RING1 core residue                                  |                                                                                                                                                                                                              |



|                                                                 |              |                                                                                                    |                                                                                                                                                                                                                                                                                   |
|-----------------------------------------------------------------|--------------|----------------------------------------------------------------------------------------------------|-----------------------------------------------------------------------------------------------------------------------------------------------------------------------------------------------------------------------------------------------------------------------------------|
| <b>T351P</b>                                                    | IBR          | Disrupt IBR $\beta$ -sheet, next to Zn-coordinating Cys                                            | IBR domain destabilisation (Beasley <i>et al</i> , 2007)                                                                                                                                                                                                                          |
| <b>R366T</b><br><b>R366Q</b>                                    | IBR          | IBR core residue, also on interface with RING1                                                     |                                                                                                                                                                                                                                                                                   |
| <b>P437L</b><br><b>P437I</b>                                    | RING2        | Near Zn1 binding site                                                                              | Ligase dead (Sriram <i>et al</i> , 2005)                                                                                                                                                                                                                                          |
| <b><u>Residues affecting ubiquitination mechanism</u></b>       |              |                                                                                                    |                                                                                                                                                                                                                                                                                   |
| <b>D243N</b>                                                    | RING1        | Forms contact with conserved Lys on E2 helix 1                                                     |                                                                                                                                                                                                                                                                                   |
| <b>C431F</b>                                                    | RING2        | Active site Cys                                                                                    | - Reduced solubility (Wang <i>et al</i> , 2005; Sriram <i>et al</i> , 2005)<br>- Increases autoubiquitination (Sriram <i>et al</i> , 2005)<br>- No substrate ubiquitination (Sriram <i>et al</i> , 2005)<br>- Reduced translocation to mitochondria (Lazarou <i>et al</i> , 2013) |
| <b>E444Q</b>                                                    | RING2        | Potential catalytic triad residue (unconfirmed)                                                    |                                                                                                                                                                                                                                                                                   |
| <b><u>Interface residues between RING2 &amp; UPD</u></b>        |              |                                                                                                    |                                                                                                                                                                                                                                                                                   |
| <b>S145N</b>                                                    | UPD          | Destabilises interface?                                                                            |                                                                                                                                                                                                                                                                                   |
| <b>M192L</b><br><b>M192V</b>                                    | UPD          | Destabilises interface?                                                                            |                                                                                                                                                                                                                                                                                   |
| <b>S193I</b>                                                    | UPD          | Destabilises interface?                                                                            |                                                                                                                                                                                                                                                                                   |
| <b>G429D</b>                                                    | RING2        | Destabilises interface?                                                                            |                                                                                                                                                                                                                                                                                   |
| <b>G430D</b>                                                    | RING2        | Destabilises interface?                                                                            | - Ligase dead (Chew <i>et al</i> , 2011)<br>- Increased auto-ubiquitination (Sriram <i>et al</i> , 2005)<br>- Reduced substrate ubiquitination (Sriram <i>et al</i> , 2005)                                                                                                       |
| <b>M458L</b>                                                    | RING2        | Near RING2 UPD interface but exposed                                                               |                                                                                                                                                                                                                                                                                   |
| <b>A230T</b>                                                    | RING1        | May create RING1/RING2 interface.<br>May affect Linker helix binding<br>May affect RING1 structure |                                                                                                                                                                                                                                                                                   |
| <b><u>Interface residues between RING1 and linker helix</u></b> |              |                                                                                                    |                                                                                                                                                                                                                                                                                   |
| <b>R234Q</b>                                                    | RING1        | May affect linker helix binding                                                                    |                                                                                                                                                                                                                                                                                   |
| <b>A398T</b>                                                    | Linker helix | Disrupts linker helix binding                                                                      |                                                                                                                                                                                                                                                                                   |
| <b>A401D</b>                                                    | Linker helix | Disrupts linker helix binding                                                                      |                                                                                                                                                                                                                                                                                   |
| <b><u>Residues in RING1:IBR interface</u></b>                   |              |                                                                                                    |                                                                                                                                                                                                                                                                                   |
| <b>N273S</b>                                                    | RING1        | Destabilises interface?                                                                            |                                                                                                                                                                                                                                                                                   |
| <b>E310D</b>                                                    | RING1        | Destabilises interface?                                                                            |                                                                                                                                                                                                                                                                                   |

|                                                                |       |                                                           |                                                                                                                                                                                                                                         |
|----------------------------------------------------------------|-------|-----------------------------------------------------------|-----------------------------------------------------------------------------------------------------------------------------------------------------------------------------------------------------------------------------------------|
| <b>Q311H</b>                                                   | RING1 | Destabilises interface?                                   |                                                                                                                                                                                                                                         |
| <b>G328E</b>                                                   | RING1 | Loop between RING1 and IBR<br>Destabilises interface?     | - Increased auto-ubiquitination (Sriram <i>et al</i> , 2005)<br>- Reduced substrate ubiquitination (Sriram <i>et al</i> , 2005)<br>- Reduced solubility (Wang <i>et al</i> , 2005)                                                      |
| <b><u>Putative phospho-peptide binding site</u></b>            |       |                                                           |                                                                                                                                                                                                                                         |
| <b>K161N</b>                                                   | UPD   | - Phospho-peptide binding site?<br>- Salt bridge to Ring2 | - Reduced complex formation (Van Humbeeck <i>et al</i> , 2008)<br>- Ligase dead (Sriram <i>et al</i> , 2005)<br>- Ubiquitinates substrate (Hampe <i>et al</i> , 2006)<br>- Reduced mitochondria clearance (Geisler <i>et al</i> , 2010) |
| <b>K211N</b>                                                   | UPD   | Phospho-peptide binding site?                             | - Reduced complex formation (Van Humbeeck <i>et al</i> , 2008)<br>- Reduced mitochondrial localization (Matsuda <i>et al</i> , 2010)                                                                                                    |
| <b><u>Residues with unclear effects on Parkin function</u></b> |       |                                                           |                                                                                                                                                                                                                                         |
| <b>H200Q</b>                                                   | UPD   | Exposed in UPD                                            |                                                                                                                                                                                                                                         |
| <b>V244I</b>                                                   | RING1 | On RING1, exposed                                         |                                                                                                                                                                                                                                         |
| <b>H265R</b>                                                   | RING1 | On RING1, exposed                                         |                                                                                                                                                                                                                                         |
| <b>D280N</b>                                                   | RING1 | $\beta$ -sheet insertion in RING1                         | Reduced solubility (Wang <i>et al</i> , 2005)                                                                                                                                                                                           |
| <b>L283P</b>                                                   | RING1 | $\beta$ -sheet insertion in RING1                         |                                                                                                                                                                                                                                         |
| <b>G284R</b>                                                   | RING1 | $\beta$ -sheet insertion in RING1                         |                                                                                                                                                                                                                                         |
| <b>T415N</b>                                                   | RING2 | Exposed in RING2.                                         | Ligase dead (Sriram <i>et al</i> , 2005; Matsuda <i>et al</i> , 2010)                                                                                                                                                                   |

## Supplementary References

- Beasley SA, Hristova VA & Shaw GS (2007) Structure of the Parkin in-between-ring domain provides insights for E3-ligase dysfunction in autosomal recessive Parkinson's disease. *Proc Natl Acad Sci USA* **104**: 3095–3100
- Borodovsky A, Ovaa H, Kolli N, Gan-Erdene T, Wilkinson KD, Ploegh HL & Kessler BM (2002) Chemistry-based functional proteomics reveals novel members of the deubiquitinating enzyme family. *Chem Biol* **9**: 1149–1159
- Chew KCM, Matsuda N, Saisho K, Lim GGY, Chai C, Tan H-M, Tanaka K & Lim KL (2011) Parkin mediates apparent E2-independent monoubiquitination in vitro and contains an intrinsic activity that catalyzes polyubiquitination. *PLoS ONE* **6**: e19720

- Geisler S, Holmström KM, Skujat D, Fiesel FC, Rothfuss OC, Kahle PJ & Springer W (2010) PINK1/Parkin-mediated mitophagy is dependent on VDAC1 and p62/SQSTM1. *Nat Cell Biol* **12**: 119–131
- Gu W-J, Corti O, Araujo F, Hampe C, Jacquier S, Lücking CB, Abbas N, Duyckaerts C, Rooney T, Pradier L, Ruberg M & Brice A (2003) The C289G and C418R missense mutations cause rapid sequestration of human Parkin into insoluble aggregates. *Neurobiol. Dis.* **14**: 357–364
- Hampe C (2006) Biochemical analysis of Parkinson's disease-causing variants of Parkin, an E3 ubiquitin-protein ligase with monoubiquitylation capacity. *Hum Mol Genet* **15**: 2059–2075
- Hampe C, Ardila-Osorio H, Fournier M, Brice A & Corti O (2006) Biochemical analysis of Parkinson's disease-causing variants of Parkin, an E3 ubiquitin-protein ligase with monoubiquitylation capacity. *Hum Mol Genet* **15**: 2059–2075
- Lazarou M, Narendra DP, Jin SM, Tekle E, Banerjee S & Youle RJ (2013) PINK1 drives Parkin self-association and HECT-like E3 activity upstream of mitochondrial binding. *J Cell Biol* **200**: 163–172
- Matsuda N, Sato S, Shiba K, Okatsu K, Saisho K, Gautier CA, Sou Y-S, Saiki S, Kawajiri S, Sato F, Kimura M, Komatsu M, Hattori N & Tanaka K (2010) PINK1 stabilized by mitochondrial depolarization recruits Parkin to damaged mitochondria and activates latent Parkin for mitophagy. *J Cell Biol* **189**: 211–221
- Narendra DP, Jin SM, Tanaka A, Suen D-F, Gautier CA, Shen J, Cookson MR & Youle RJ (2010) PINK1 is selectively stabilized on impaired mitochondria to activate Parkin. *PLoS Biol* **8**: e1000298
- Sriram SR, Li X, Ko HS, Chung KKK, Wong E, Lim KL, Dawson VL & Dawson TM (2005) Familial-associated mutations differentially disrupt the solubility, localization, binding and ubiquitination properties of parkin. *Hum Mol Genet* **14**: 2571–2586
- Van Humbeeck C, Waelkens E, Corti O, Brice A & Vandenberghe W (2008) Parkin occurs in a stable, non-covalent, approximately 110-kDa complex in brain. *Eur. J. Neurosci.* **27**: 284–293
- Wang C, Tan JMM, Ho MWL, Zaiden N, Wong SH, Chew CLC, Eng PW, Lim TM, Dawson TM & Lim KL (2005) Alterations in the solubility and intracellular localization of parkin by several familial Parkinson's disease-linked point mutations. *Journal of Neurochemistry* **93**: 422–431
